# Supplementary material
Source: PubMed Central journal article supplement (PMC5879624)
Supplement: rspb20172596supp1.pdf [file rspb20172596supp1.pdf]

## Eco-evolutionary feedbacks promote fluctuating selection and long-term stability of species-rich antagonistic networks

Authors: Cecilia Siliansky de Andreazzi, Paulo R. Guimarães Jr and Carlos J. Melián.

### Supporting Information

Table S2. Dataset<sup>1</sup> used to parameterize the matrix  $\mathbf{X}$ , including the type of interaction and network basic characteristics ( $N_V$  = number of victims;  $N_E$  = number of exploiters,  $C$  = Connectance).

| Data set           | Type                          | $N_V$ | $N_E$ | $C$  | Reference               |
|--------------------|-------------------------------|-------|-------|------|-------------------------|
| herb2              | Mammalian grazers –<br>plants | 10    | 17    | 0.6  | Hansen et al. 1985      |
| herb5              | Gallers – host plants         | 10    | 17    | 0.12 | Dawah et al. 1995       |
| herb14             | Gallers – host plants         | 10    | 16    | 0.12 | Tscharntke et al. 2001  |
| pred1 <sup>2</sup> | Mammalian predator –<br>prey  | 16    | 8     | 0.52 | Baskerville et al. 2011 |
| pred2              | Mammalian predator –<br>prey  | 22    | 5     | 0.8  | Owen-Smith & Mills 2008 |
| pred6              | Mammalian predator –<br>prey  | 18    | 4     | 0.66 | Radloff & du Toit 2004  |
| bac1               | Bacteriophage - bacteria      | 11    | 4     | 0.5  | Abe & Tanji 2007        |
| bac10              | Bacteriophage - bacteria      | 5     | 17    | 0.46 | DePaola et al. 1998     |
| bac11              | Bacteriophage - bacteria      | 15    | 10    | 0.27 | Doi et al. 2003         |
| bac13              | Bacteriophage - bacteria      | 6     | 7     | 0.21 | Gamage et al. 2004      |
| bac18              | Bacteriophage - bacteria      | 11    | 10    | 0.66 | Krylov et al. 2006      |
| bac2               | Bacteriophage - bacteria      | 14    | 6     | 0.3  | Barrangou et al. 2002   |
| bac25              | Bacteriophage - bacteria      | 8     | 4     | 0.66 | Mizoguchi et al. 2003   |
| bac31              | Bacteriophage - bacteria      | 24    | 6     | 0.21 | Seed & Dennis 2005      |
| bac34              | Bacteriophage - bacteria      | 7     | 9     | 0.17 | Suttle & Chan 1993      |
| bac36              | Bacteriophage - bacteria      | 18    | 7     | 0.09 | Wang & Chen 2008        |

|       |                          |    |    |      |                        |
|-------|--------------------------|----|----|------|------------------------|
| bac4  | Bacteriophage - bacteria | 9  | 5  | 0.31 | Campbell et al. 2006   |
| bac5  | Bacteriophage - bacteria | 18 | 8  | 0.37 | Capparelli et al. 2010 |
| bac6  | Bacteriophage - bacteria | 23 | 4  | 0.18 | Caso et al. 2006       |
| par12 | Parasites - fish host    | 6  | 21 | 0.25 | Bensley et al. 2011    |
| par21 | Parasites - fish host    | 8  | 14 | 0.29 | Morozińska-Gogol 2007  |
| par22 | Parasites - fish host    | 11 | 20 | 0.23 | Choudhury et al. 2004  |
| par31 | Parasites - fish host    | 8  | 20 | 0.19 | Jalali & Barzegar 2006 |

<sup>1</sup> These datasets are available online at the Interaction Web Database ([www.nceas.ucsb.edu/interactionweb/index.html](http://www.nceas.ucsb.edu/interactionweb/index.html)) and compiled in Pires & Guimarães (2013), Flores et al. (2011) and Bellay et al. (2013)

<sup>2</sup> Subnetwork depicting predator-prey interactions between mammals weighing > 5kg

## References

- Abe, M., Izumoji, Y., & Tanji, Y. 2007. Phenotypic transformation including host-range transition through superinfection of T-even phages. *FEMS Microbiol. Lett.* **269**: 145-152.
- Barrangou, R., Yoon, S.S., Breidt Jr, F., Fleming, H.P. & Klaenhammer, T.R. 2002. Characterization of six *Leuconostoc fallax* bacteriophages isolated from an industrial sauerkraut fermentation. *Appl. Environ. Microbiol.* **68**: 5452-5452.
- Baskerville, E.B., Dobson, A.P., Bedford, T., Allesina, S., Anderson, T.M. & Pascual, M. 2011 Spatial guilds in the Serengeti food web revealed by a bayesian group model. *PLoS Comput. Biol.* **7**: e1002321.
- Bellay, S., de Oliveira, E.F., Almeida-Neto, M., Jr, D.L., Takemoto, R.M. & Luque, J.L. 2013. Developmental stage of parasites influences the structure of fish-parasite networks. *PLoS ONE*: 8(e75710).
- Bensley, M., Dick, T.A, Hudson, C., Lumsden, J.S, Peters, K.K, et al. 2011. Devils Lake – Red River Basin fish parasite and pathogen project: qualitative risk assessment. *International Joint Commission*. 45 p. Available: [http://www.ijc.org/rel/news/2011/111027\\_e.htm](http://www.ijc.org/rel/news/2011/111027_e.htm). Accessed 10 December 2016.
- Campbell, J.I.A., Albrechtsen, M., & Sørensen, J. 2006. Large *Pseudomonas* phages isolated from barley rhizosphere. *FEMS Microbiol. Ecol.* **18**: 63-74.
- Capparelli, R., et al. 2010. Bacteriophage therapy of *Salmonella enterica*: a fresh appraisal of bacteriophage therapy. *J. Inf. Dis.* **201**: 52-61.
- Caso, J.L., et al. 1995. Isolation and characterization of temperate and virulent bacteriophages of *Lactobacillus plantarum*. *J. Dairy Sci.* **78**: 741-750.
- Choudhury, A., Hoffnagle, T.L., Cole, R.A. 2004. Parasites of native and nonnative fishes of the Little Colorado River, Grand Canyon, Arizona. *J Parasitol.* **90**: 1042-1053.

- Dawah, H.A., Hawkins, B.A. & Claridge, M.F. 1995. Structure of the parasitoid communities of grass-feeding chalcid wasps. *J. Anim. Ecol.* **64**: 708–720.
- DePaola, A., Motes, M.L., Chan, A.M. & Suttle, C.A. 1998. Phages infecting *Vibrio vulnificus* are abundant and diverse in oysters (*Crassostrea virginica*) collected from the Gulf of Mexico. *Appl. Environ. Microbiol.* **64**: 346-351.
- Doi, K., *et al.* 2003. A comparative study and phage typing of silage-making *Lactobacillus* bacteriophages. *J. Biosci. Bioeng.* **95**: 518-525.
- Flores, C.O., Meyer, J.R., Valverde, S., Farr, L. & Weitz, J.S. 2011. Statistical structure of host–phage interactions. *Proc. Nat. Acad. Sci.* **108**: E288-E297.
- Gamage, S.D., Patton, A.K, Hanson, J.F. & Weiss, A.A. 2004. Diversity and host range of Shiga toxin-encoding phage. *Infect. Immun.* **72**: 7131-7131.
- Jalali, B. & Barzegar, M. 2006. Fish Parasites in Zarivar Lake. *J Agric. Sci. Technol.* **8**: 47–58.
- Krylov, V.N, *et al.* 2006. Ambivalent bacteriophages of different species active on *Escherichia coli* K12 and *Salmonella* sp. strains. *Russ. J. Genet.* **42**:106-114.
- Mizoguchi, K., *et al.* 2003. Coevolution of bacteriophage PP01 and *Escherichia coli* O157: H7 in continuous culture. *Appl. Environ. Microbiol.* **69**: 170-176.
- Morozińska-Gogol, J. 2007. Metazoan parasites of fish from the Łebsko Lagoon (Central Coast, Poland). *Balt Coast Zone* **11**: 51–58.
- Owen–Smith, N. & Mills, M.G.L. 2008 Predator – prey size relationships in an African large–mammal food web. *J. Anim. Ecol.* **77**: 173–183.
- Pires, M.M. & Guimarães, P.R. 2012. Interaction intimacy organizes networks of antagonistic interactions in different ways. *J. Royal Soc. Interf.* p.rsif20120649.
- Radloff, F.G.T. & Du Toit, J.T. 2004. Large predators and their prey in a southern African savanna: a predator’s size determines its prey size range. *J. Anim. Ecol.* **73**: 410-423.
- Seed, K.D. & Dennis, J.J. 2005. Isolation and characterization of bacteriophages of the *Burkholderia cepacia* complex. *FEMS Microbiol. Lett.* **251**: 273- 280.
- Suttle, C. & Chan, A. 1993. Marine cyanophages infecting oceanic and coastal strains of *Synechococcus*: abundance, morphology, cross-infectivity and growth characteristics. *Mar. Ecol. Prog. Ser.* **92**: 99-109.
- Tscharntke, T., Vidal, S. & Hawkins, B.A. 2001. Parasitoids of grass-feeding chalcid wasps: a comparison of German and British communities. *Oecologia* **129**: 445-451.
- Wang, K. & Chen, F. 2008. Prevalence of highly host-specific cyanophages in the estuarine environment. *Environ. Microbiol.* **10**: 300-312.
