# Supplementary material
Source: PubMed Central journal article supplement (PMC5879624)
Supplement: rspb20172596supp3.pdf [file rspb20172596supp3.pdf]

## Eco-evolutionary feedbacks promote fluctuating selection and long-term stability of species-rich antagonistic networks

Authors: Cecilia Siliansky de Andreazzi, Paulo R. Guimarães Jr and Carlos J. Melián.

### Supporting Information

Table S1: List of parameters and variables used in the simulations.

| Term         | Definition                                                   | Initial conditions                                  |
|--------------|--------------------------------------------------------------|-----------------------------------------------------|
| $N_V$        | Number of victim species                                     | Parameterized with data from the empirical networks |
| $N_E$        | Number of exploiter species                                  | Parameterized with data from the empirical networks |
| $V_i$        | Victim species abundance                                     | Normal (mean = 0.5, sd = 0.1)                       |
| $E_j$        | Exploiter species abundance                                  | Normal (mean = 0.1, sd = 0.1)                       |
| $z_i$        | Victim species mean trait                                    | Normal (mean = 0, sd = 0.1)                         |
| $y_j$        | Exploiter species mean trait                                 | Normal (mean = 0, sd = 0.1)                         |
| $c_i$        | Victim intraspecific competition                             | 1                                                   |
| $c_j$        | Exploiter intraspecific competition                          | 1                                                   |
| $b_i$        | Victim intrinsic birth rate                                  | 1.01                                                |
| $b_j$        | Exploiter intrinsic birth rate                               | 0.3                                                 |
| $\theta_i$   | Victim trait favored by environmental selection              | $\theta_i = z_i^{t=0}$                              |
| $\theta_j$   | Exploiter trait favored by environmental selection           | $\theta_j = y_j^{t=0}$                              |
| $\alpha$     | Sensitivity to environmental selection                       | Parameter                                           |
| $d_i$        | Victim death rate                                            | Variable                                            |
| $d_j$        | Exploiter death rate                                         | Variable                                            |
| $m_{ij}$     | Trait matching                                               | Variable                                            |
| $\mathbf{X}$ | Binary matrix of species interactions                        | Parameterized with data from the empirical networks |
| $\gamma$     | Sensitivity to interaction selection                         | Parameter                                           |
| $\varphi$    | Constant proportional to the slope of the selection gradient | 0.25                                                |
| $W_i$        | Victim species fitness                                       | Variable                                            |
| $W_j$        | Exploiter species fitness                                    | Variable                                            |
