# Supplementary material
Source: PubMed Central journal article supplement (PMC5879624)
Supplement: rspb20172596supp4.pdf [file rspb20172596supp4.pdf]

## Eco-evolutionary feedbacks promote fluctuating selection and long-term stability of species-rich antagonistic networks

Authors: Cecilia Siliansky de Andreazzi, Paulo R. Guimarães Jr and Carlos J. Melián.

### Supporting Information

Table S3: Comparison of population and trait dynamics (intercepts  $\pm$  standard error) among selection scenarios: both environmental and interaction selection weak ( $\beta_1$ ), strong ( $\beta_2$ ), stronger interaction than environmental selection ( $\beta_3$ ) and stronger environmental than interaction selection ( $\beta_4$ ).

|                                              | $\beta_1(\text{both weak})$ | $\beta_2(\text{both strong})$ | $\beta_3(\text{interaction stronger})$ | $\beta_4(\text{environmental stronger})$ |
|----------------------------------------------|-----------------------------|-------------------------------|----------------------------------------|------------------------------------------|
| Mean abundance                               | $0.06 \pm 0.001$            | $0.06 \pm 0.001$              | $0.075 \pm 0.001$                      | $0.06 \pm 0.001$                         |
| Abundance variance                           | $0.015 \pm 0.0003$          | $0.016 \pm 0.0004$            | $0.002 \pm 0.0004$                     | $0.016 \pm 0.0004$                       |
| Mean trait (log)                             | $-4.1 \pm 0.02$             | $-4.15 \pm 0.03$              | $-3 \pm 0.03$                          | $-4.1 \pm 0.03$                          |
| Trait variance (log)                         | $-7.4 \pm 0.02$             | $-7.5 \pm 0.03$               | $-2.2 \pm 0.03$                        | $-12 \pm 0.03$                           |
| Mean interaction fluctuating selection (log) | $1.01 \pm 0.05$             | $0.98 \pm 0.07$               | $4.97 \pm 0.05$                        | $-2.14 \pm 0.05$                         |
| Fluctuating selection variance (log)         | $-0.67 \pm 0.26$            | $-0.7 \pm 0.26$               | $6.96 \pm 0.26$                        | $-5.27 \pm 0.26$                         |
